# Supplementary material for: High-density polyethylene composites filled with micro- and nano-particles of nickel ferrite: magnetic, mechanical, and thermal properties
Source: Royal Society of Chemistry journal article supplement (doi:10.1039/d4ra02643h), 2024-01-01
Supplement: d4ra02643h1.pdf [file d4ra02643h1.pdf]

# **Optimizing High-Density Polyethylene with Nickel Ferrite Micro/Nanoparticles for Superior Magnetic, Mechanical, and Thermal Properties**

Sarah BAAYYAD<sup>1</sup>, Youssef ESSHOUBA<sup>1</sup>, Soufiane BARHOUMI<sup>1</sup>, El Kébir HLIL <sup>3</sup>, Siham  
EZ-ZAHRAOUI<sup>1</sup>, Fatima-Zahra SEMLALI<sup>1</sup>, Tarik MAHFOUD<sup>2</sup>, Hassan EL MOUSSAOUI<sup>2\*</sup>,  
Mounir EL ACHABY<sup>1\*</sup>

<sup>1</sup>Materials Science, Energy and Nanoengineering Department (MSN), Mohammed VI Polytechnic  
University (UM6P), Lot 660 – Hay Moulay Rachid, 43150, Ben Guerir, Morocco.

<sup>2</sup>Moroccan Foundation for Advanced Science, Innovation and Research (MAScIR), Rabat Design Center,  
Rue Mohamed El Jazouli, Madinat El Irfane, 10100 Rabat, Morocco.

<sup>3</sup> Institut Néel, CNRS et Université Joseph Fourier, BP 166, F-38042 Grenoble cedex 9, France.

\*Corresponding author: Email: [mounir.elachaby@um6p.ma](mailto:mounir.elachaby@um6p.ma), (M. El Achaby)

\*Corresponding author: Email: [h.elmoussaoui@mascir.ma](mailto:h.elmoussaoui@mascir.ma), (H. El Moussaoui)

## 1. Characterization of the as-synthesized powder

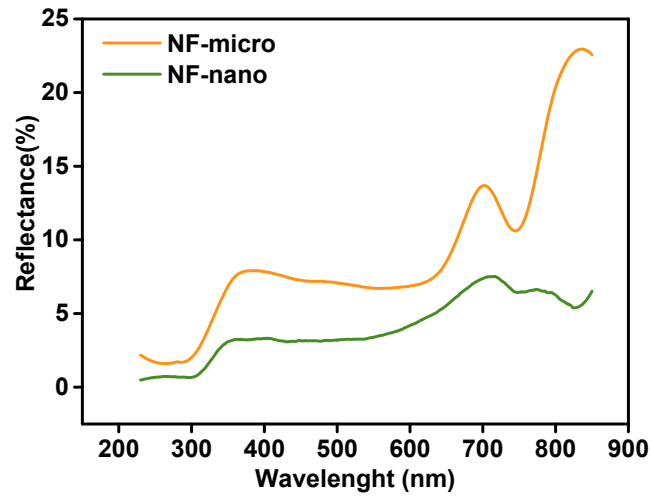

Fig. S1: UV-Visible spectra of NF-micro and NF-nano

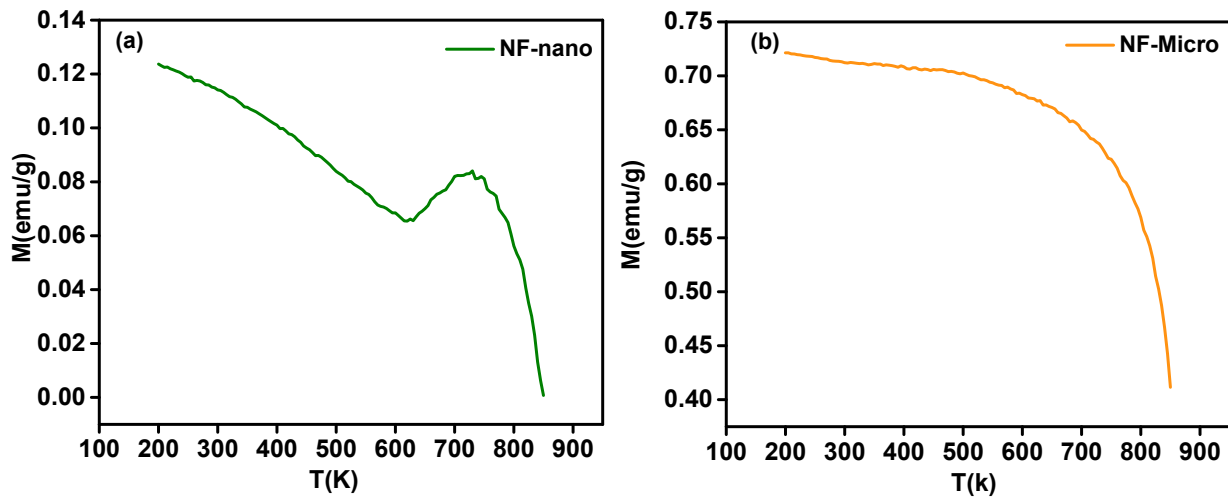

Fig. S2: Magnetization versus temperature curve for the (a)  $\text{NiFe}_2\text{O}_4$  nano and (b) micro particles

## 2. Properties of composite materials

### 2.1 Raman spectra

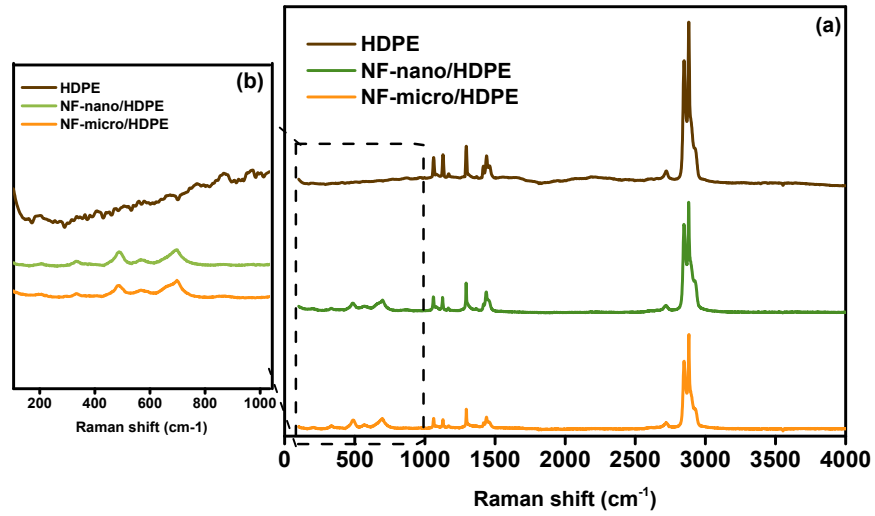

**Fig. S3:** Raman spectra of neat HDPE, NF-micro/HDPE and NF-nano/HDPE

## 2.2 UV Visible spectroscopy

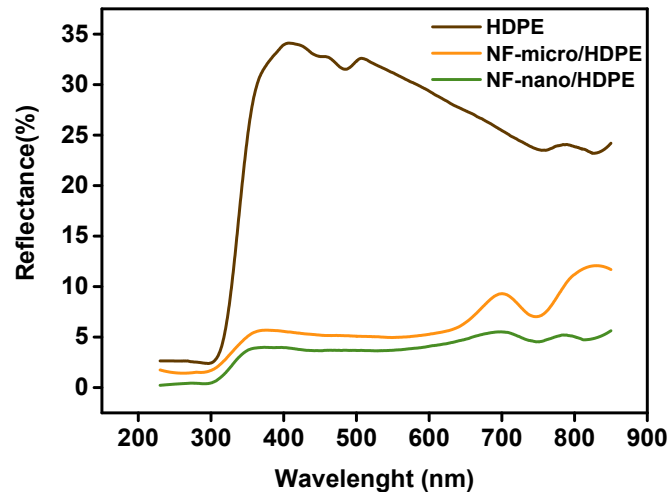

**Fig. S4:** UV-visible spectra of HDPE, NF-micro/HDPE and NF-nano/HDPE.

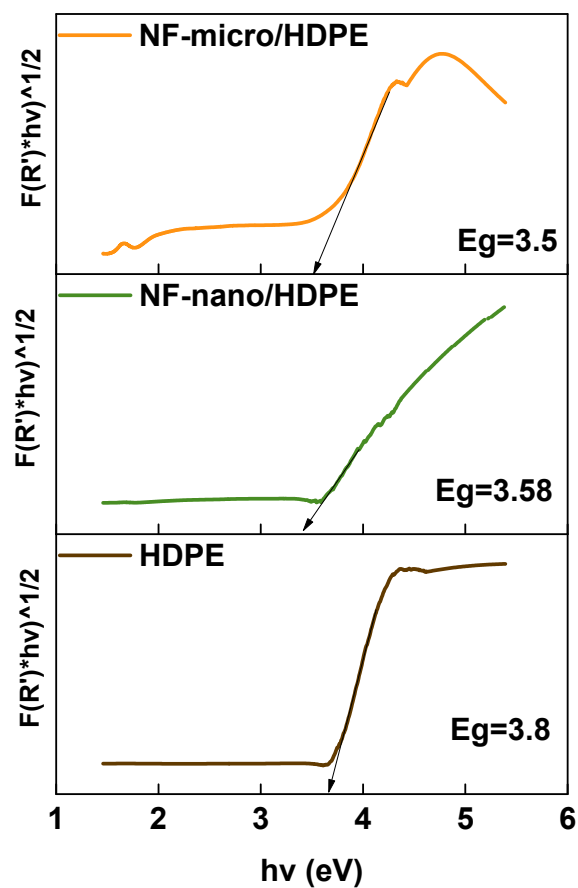

Fig. S5: UV-visible spectra of HDPE, NF-micro/HDPE and NF-nano/HDPE

### 2.3 Thermal gravimetric analysis

Table S1: Thermal degradation parameters determined by TGA of the neat HDPE and composite materials

| Samples       | $T_{max}$ | $T_{onset}$ |
|---------------|-----------|-------------|
| HDPE          | 471.11    | 422.02      |
| NF-nano/HDPE  | 471.62    | 426.10      |
| NF-micro/HDPE | 460.09    | 426.83      |

### 2.4 Differential Scanning Calorimetry

**Table S2:** DSC data of neat HDPE and composite materials

| <b>Samples</b>       | <b>T<sub>c</sub> (°C)</b> | <b>ΔH<sub>c</sub> (J/g)</b> | <b>T<sub>m</sub> (°C)</b> | <b>ΔH<sub>m</sub> (J/g)</b> | <b>χ<sub>c</sub> (%)</b> |
|----------------------|---------------------------|-----------------------------|---------------------------|-----------------------------|--------------------------|
| <b>HDPE</b>          | 117.10                    | 164.16                      | 129.02                    | 161.37                      | 55.15                    |
| <b>NF-nano/HDPE</b>  | 120.63                    | 93.20                       | 130.17                    | 95.62                       | 46.68                    |
| <b>NF-micro/HDPE</b> | 118.92                    | 113.86                      | 129.75                    | 102.11                      | 49.85                    |
